# Supplementary material
Source: ML conference proceedings conference paper supplement (https://proceedings.neurips.cc/paper_files/paper/2022/hash/58f4a9ca9031ff197cb4a61b456574bf-Abstract.html)
Supplement: Supplementary file 1 [file 58f4a9ca9031ff197cb4a61b456574bf-Supplemental-Conference.zip]

Archive with 630 entries (588 files):
- supplementary_neurips/
- __MACOSX/._supplementary_neurips
- supplementary_neurips/.DS_Store
- __MACOSX/supplementary_neurips/._.DS_Store
- supplementary_neurips/code/
- __MACOSX/supplementary_neurips/._code
- supplementary_neurips/appendix.pdf
- __MACOSX/supplementary_neurips/._appendix.pdf
- supplementary_neurips/README.txt
- __MACOSX/supplementary_neurips/._README.txt
- supplementary_neurips/code/run.py
- __MACOSX/supplementary_neurips/code/._run.py
- supplementary_neurips/code/distances.py
- __MACOSX/supplementary_neurips/code/._distances.py
- supplementary_neurips/code/utils/
- __MACOSX/supplementary_neurips/code/._utils
- supplementary_neurips/code/quantitative_results.py
- __MACOSX/supplementary_neurips/code/._quantitative_results.py
- supplementary_neurips/code/models/
- __MACOSX/supplementary_neurips/code/._models
- supplementary_neurips/code/README.md
- __MACOSX/supplementary_neurips/code/._README.md
- supplementary_neurips/code/visualizations/
- __MACOSX/supplementary_neurips/code/._visualizations
- supplementary_neurips/code/configs/
- __MACOSX/supplementary_neurips/code/._configs
- supplementary_neurips/code/requirements.yml
- __MACOSX/supplementary_neurips/code/._requirements.yml
- supplementary_neurips/code/losses.py
- __MACOSX/supplementary_neurips/code/._losses.py
- supplementary_neurips/code/data/
- __MACOSX/supplementary_neurips/code/._data
- supplementary_neurips/code/utils/utils_bboxes.py
- __MACOSX/supplementary_neurips/code/utils/._utils_bboxes.py
- supplementary_neurips/code/utils/wandb_logger.py
- __MACOSX/supplementary_neurips/code/utils/._wandb_logger.py
- supplementary_neurips/code/utils/__init__.py
- __MACOSX/supplementary_neurips/code/utils/.___init__.py
- supplementary_neurips/code/utils/utils.py
- __MACOSX/supplementary_neurips/code/utils/._utils.py
- supplementary_neurips/code/utils/optimizer.py
- __MACOSX/supplementary_neurips/code/utils/._optimizer.py
- supplementary_neurips/code/models/general_model.py
- __MACOSX/supplementary_neurips/code/models/._general_model.py
- supplementary_neurips/code/models/trajectory_model.py
- __MACOSX/supplementary_neurips/code/models/._trajectory_model.py
- supplementary_neurips/code/models/__init__.py
- __MACOSX/supplementary_neurips/code/models/.___init__.py
- supplementary_neurips/code/models/prediction.py
- __MACOSX/supplementary_neurips/code/models/._prediction.py
- supplementary_neurips/code/models/networks/
- __MACOSX/supplementary_neurips/code/models/._networks
- supplementary_neurips/code/models/rnn_model.py
- __MACOSX/supplementary_neurips/code/models/._rnn_model.py
- supplementary_neurips/code/models/trajectory_dict.py
- __MACOSX/supplementary_neurips/code/models/._trajectory_dict.py
- supplementary_neurips/code/visualizations/visualize_negatives_matrix.py
- __MACOSX/supplementary_neurips/code/visualizations/._visualize_negatives_matrix.py
- supplementary_neurips/code/configs/checkpoint/
- __MACOSX/supplementary_neurips/code/configs/._checkpoint
- supplementary_neurips/code/configs/dataset/
- __MACOSX/supplementary_neurips/code/configs/._dataset
- supplementary_neurips/code/configs/experiments/
- __MACOSX/supplementary_neurips/code/configs/._experiments
- supplementary_neurips/code/configs/resume/
- __MACOSX/supplementary_neurips/code/configs/._resume
- supplementary_neurips/code/configs/__init__.py
- __MACOSX/supplementary_neurips/code/configs/.___init__.py
- supplementary_neurips/code/configs/README.md
- __MACOSX/supplementary_neurips/code/configs/._README.md
- supplementary_neurips/code/configs/model/
- __MACOSX/supplementary_neurips/code/configs/._model
- supplementary_neurips/code/configs/trainer/
- __MACOSX/supplementary_neurips/code/configs/._trainer
- supplementary_neurips/code/configs/default.yaml
- __MACOSX/supplementary_neurips/code/configs/._default.yaml
- supplementary_neurips/code/configs/wandb/
- __MACOSX/supplementary_neurips/code/configs/._wandb
- supplementary_neurips/code/configs/debug/
- __MACOSX/supplementary_neurips/code/configs/._debug
- supplementary_neurips/code/data/base_dataset.py
- __MACOSX/supplementary_neurips/code/data/._base_dataset.py
- supplementary_neurips/code/data/data_utils/
- __MACOSX/supplementary_neurips/code/data/._data_utils
- supplementary_neurips/code/data/datasets/
- __MACOSX/supplementary_neurips/code/data/._datasets
- supplementary_neurips/code/data/__init__.py
- __MACOSX/supplementary_neurips/code/data/.___init__.py
- supplementary_neurips/code/data/main_data_module.py
- __MACOSX/supplementary_neurips/code/data/._main_data_module.py
- supplementary_neurips/code/models/networks/baselines_networks.py
- __MACOSX/supplementary_neurips/code/models/networks/._baselines_networks.py
- supplementary_neurips/code/models/networks/transformers.py
- __MACOSX/supplementary_neurips/code/models/networks/._transformers.py
- supplementary_neurips/code/models/networks/__init__.py
- __MACOSX/supplementary_neurips/code/models/networks/.___init__.py
- supplementary_neurips/code/models/networks/__pycache__/
- __MACOSX/supplementary_neurips/code/models/networks/.___pycache__
- supplementary_neurips/code/models/networks/implicit.py
- __MACOSX/supplementary_neurips/code/models/networks/._implicit.py
- supplementary_neurips/code/models/networks/networks_utils/
- __MACOSX/supplementary_neurips/code/models/networks/._networks_utils
- supplementary_neurips/code/models/networks/positional_encodings.py
- __MACOSX/supplementary_neurips/code/models/networks/._positional_encodings.py
- supplementary_neurips/code/models/networks/video_models/
- __MACOSX/supplementary_neurips/code/models/networks/._video_models
- supplementary_neurips/code/configs/checkpoint/after_each_epoch.yaml
- __MACOSX/supplementary_neurips/code/configs/checkpoint/._after_each_epoch.yaml
- supplementary_neurips/code/configs/checkpoint/every_n_train_steps.yaml
- __MACOSX/supplementary_neurips/code/configs/checkpoint/._every_n_train_steps.yaml
- supplementary_neurips/code/configs/dataset/fisv.yaml
- __MACOSX/supplementary_neurips/code/configs/dataset/._fisv.yaml
- supplementary_neurips/code/configs/dataset/diving48.yaml
- __MACOSX/supplementary_neurips/code/configs/dataset/._diving48.yaml
- supplementary_neurips/code/configs/dataset/finegym.yaml
- __MACOSX/supplementary_neurips/code/configs/dataset/._finegym.yaml
- supplementary_neurips/code/configs/dataset/dataset_defaults.yaml
- __MACOSX/supplementary_neurips/code/configs/dataset/._dataset_defaults.yaml
- supplementary_neurips/code/configs/experiments/qualitative_results/
- __MACOSX/supplementary_neurips/code/configs/experiments/._qualitative_results
- supplementary_neurips/code/configs/experiments/quantitative_results/
- __MACOSX/supplementary_neurips/code/configs/experiments/._quantitative_results
- supplementary_neurips/code/configs/experiments/train/
- __MACOSX/supplementary_neurips/code/configs/experiments/._train
- supplementary_neurips/code/configs/resume/resume_defaults.yaml
- __MACOSX/supplementary_neurips/code/configs/resume/._resume_defaults.yaml
- supplementary_neurips/code/configs/model/optim_params/
- __MACOSX/supplementary_neurips/code/configs/model/._optim_params
- supplementary_neurips/code/configs/model/loss_params/
- __MACOSX/supplementary_neurips/code/configs/model/._loss_params
- supplementary_neurips/code/configs/model/default_model.yaml
- __MACOSX/supplementary_neurips/code/configs/model/._default_model.yaml
- supplementary_neurips/code/configs/model/model_params/
- __MACOSX/supplementary_neurips/code/configs/model/._model_params
- supplementary_neurips/code/configs/trainer/all_gpus.yaml
- __MACOSX/supplementary_neurips/code/configs/trainer/._all_gpus.yaml
- supplementary_neurips/code/configs/trainer/single_gpu.yaml
- __MACOSX/supplementary_neurips/code/configs/trainer/._single_gpu.yaml
- supplementary_neurips/code/configs/wandb/wandb.yaml
- __MACOSX/supplementary_neurips/code/configs/wandb/._wandb.yaml
- supplementary_neurips/code/configs/debug/run_nosave.yaml
- __MACOSX/supplementary_neurips/code/configs/debug/._run_nosave.yaml
- supplementary_neurips/code/configs/debug/run_cpu.yaml
- __MACOSX/supplementary_neurips/code/configs/debug/._run_cpu.yaml
- supplementary_neurips/code/configs/debug/debug.yaml
- __MACOSX/supplementary_neurips/code/configs/debug/._debug.yaml
- supplementary_neurips/code/configs/debug/debug_nosave.yaml
- __MACOSX/supplementary_neurips/code/configs/debug/._debug_nosave.yaml
- supplementary_neurips/code/configs/debug/debug_cpu.yaml
- __MACOSX/supplementary_neurips/code/configs/debug/._debug_cpu.yaml
- supplementary_neurips/code/data/data_utils/extract_keypoints_videos.py
- __MACOSX/supplementary_neurips/code/data/data_utils/._extract_keypoints_videos.py
- supplementary_neurips/code/data/data_utils/__init__.py
- __MACOSX/supplementary_neurips/code/data/data_utils/.___init__.py
- supplementary_neurips/code/data/data_utils/extract_keypoints_images.py
- __MACOSX/supplementary_neurips/code/data/data_utils/._extract_keypoints_images.py
- supplementary_neurips/code/data/data_utils/__pycache__/
- __MACOSX/supplementary_neurips/code/data/data_utils/.___pycache__
- supplementary_neurips/code/data/data_utils/shot_detection.py
- __MACOSX/supplementary_neurips/code/data/data_utils/._shot_detection.py
- supplementary_neurips/code/data/datasets/human_keypoints.py
- __MACOSX/supplementary_neurips/code/data/datasets/._human_keypoints.py
- supplementary_neurips/code/models/networks/__pycache__/__init__.cpython-38.pyc
- __MACOSX/supplementary_neurips/code/models/networks/__pycache__/.___init__.cpython-38.pyc
- supplementary_neurips/code/models/networks/__pycache__/feature_transformers.cpython-37.pyc
- __MACOSX/supplementary_neurips/code/models/networks/__pycache__/._feature_transformers.cpython-37.pyc
- supplementary_neurips/code/models/networks/__pycache__/feature_transformers.cpython-38.pyc
- __MACOSX/supplementary_neurips/code/models/networks/__pycache__/._feature_transformers.cpython-38.pyc
- supplementary_neurips/code/models/networks/__pycache__/__init__.cpython-37.pyc
- __MACOSX/supplementary_neurips/code/models/networks/__pycache__/.___init__.cpython-37.pyc
- supplementary_neurips/code/models/networks/networks_utils/__pycache__/
- __MACOSX/supplementary_neurips/code/models/networks/networks_utils/.___pycache__
- supplementary_neurips/code/models/networks/video_models/__pycache__/
- __MACOSX/supplementary_neurips/code/models/networks/video_models/.___pycache__
- supplementary_neurips/code/configs/experiments/qualitative_results/finegym_pca_speed.yaml
- __MACOSX/supplementary_neurips/code/configs/experiments/qualitative_results/._finegym_pca_speed.yaml
- supplementary_neurips/code/configs/experiments/qualitative_results/finegym_pca_temporal_offset.yaml
- __MACOSX/supplementary_neurips/code/configs/experiments/qualitative_results/._finegym_pca_temporal_offset.yaml
- supplementary_neurips/code/configs/experiments/qualitative_results/finegym_bbox_triplet_asym_long_interpolation.yaml
- __MACOSX/supplementary_neurips/code/configs/experiments/qualitative_results/._finegym_bbox_triplet_asym_long_interpolation.yaml
- supplementary_neurips/code/configs/experiments/quantitative_results/diving48/
- __MACOSX/supplementary_neurips/code/configs/experiments/quantitative_results/._diving48
- supplementary_neurips/code/configs/experiments/quantitative_results/finegym/
- __MACOSX/supplementary_neurips/code/configs/experiments/quantitative_results/._finegym
- supplementary_neurips/code/configs/experiments/quantitative_results/fisv/
- __MACOSX/supplementary_neurips/code/configs/experiments/quantitative_results/._fisv
- supplementary_neurips/code/configs/experiments/train/train_fisv/
- __MACOSX/supplementary_neurips/code/configs/experiments/train/._train_fisv
- supplementary_neurips/code/configs/experiments/train/train_diving/
- __MACOSX/supplementary_neurips/code/configs/experiments/train/._train_diving
- supplementary_neurips/code/configs/experiments/train/train_finegym/
- __MACOSX/supplementary_neurips/code/configs/experiments/train/._train_finegym
- supplementary_neurips/code/configs/experiments/train/baseline_design_choices_cliplevel_lr3.yaml~
- __MACOSX/supplementary_neurips/code/configs/experiments/train/._baseline_design_choices_cliplevel_lr3.yaml~
- supplementary_neurips/code/configs/model/optim_params/optim_x3d.yaml
- __MACOSX/supplementary_neurips/code/configs/model/optim_params/._optim_x3d.yaml
- supplementary_neurips/code/configs/model/optim_params/optim_adam.yaml
- __MACOSX/supplementary_neurips/code/configs/model/optim_params/._optim_adam.yaml
- supplementary_neurips/code/configs/model/optim_params/optim_mvit.yaml
- __MACOSX/supplementary_neurips/code/configs/model/optim_params/._optim_mvit.yaml
- supplementary_neurips/code/configs/model/optim_params/optim_sgd.yaml
- __MACOSX/supplementary_neurips/code/configs/model/optim_params/._optim_sgd.yaml
- supplementary_neurips/code/configs/model/optim_params/optim_defaults.yaml
- __MACOSX/supplementary_neurips/code/configs/model/optim_params/._optim_defaults.yaml
- supplementary_neurips/code/configs/model/optim_params/optim_deit.yaml
- __MACOSX/supplementary_neurips/code/configs/model/optim_params/._optim_deit.yaml
- supplementary_neurips/code/configs/model/loss_params/loss_supervised.yaml
- __MACOSX/supplementary_neurips/code/configs/model/loss_params/._loss_supervised.yaml
- supplementary_neurips/code/configs/model/loss_params/loss_defaults.yaml
- __MACOSX/supplementary_neurips/code/configs/model/loss_params/._loss_defaults.yaml
- supplementary_neurips/code/configs/model/model_params/mvit.yaml
- __MACOSX/supplementary_neurips/code/configs/model/model_params/._mvit.yaml
- supplementary_neurips/code/configs/model/model_params/timesformer_ssv2.yaml
- __MACOSX/supplementary_neurips/code/configs/model/model_params/._timesformer_ssv2.yaml
- supplementary_neurips/code/configs/model/model_params/timesformer_howto_large.yaml
- __MACOSX/supplementary_neurips/code/configs/model/model_params/._timesformer_howto_large.yaml
- supplementary_neurips/code/configs/model/model_params/x3d_s.yaml
- __MACOSX/supplementary_neurips/code/configs/model/model_params/._x3d_s.yaml
- supplementary_neurips/code/data/data_utils/__pycache__/rand_augment.cpython-37.pyc
- __MACOSX/supplementary_neurips/code/data/data_utils/__pycache__/._rand_augment.cpython-37.pyc
- supplementary_neurips/code/data/data_utils/__pycache__/transform.cpython-38.pyc
- __MACOSX/supplementary_neurips/code/data/data_utils/__pycache__/._transform.cpython-38.pyc
- supplementary_neurips/code/data/data_utils/__pycache__/random_erasing.cpython-38.pyc
- __MACOSX/supplementary_neurips/code/data/data_utils/__pycache__/._random_erasing.cpython-38.pyc
- supplementary_neurips/code/data/data_utils/__pycache__/utils.cpython-38.pyc
- __MACOSX/supplementary_neurips/code/data/data_utils/__pycache__/._utils.cpython-38.pyc
- supplementary_neurips/code/data/data_utils/__pycache__/utils.cpython-37.pyc
- __MACOSX/supplementary_neurips/code/data/data_utils/__pycache__/._utils.cpython-37.pyc
- supplementary_neurips/code/data/data_utils/__pycache__/rand_augment.cpython-38.pyc
- __MACOSX/supplementary_neurips/code/data/data_utils/__pycache__/._rand_augment.cpython-38.pyc
- supplementary_neurips/code/data/data_utils/__pycache__/transform.cpython-37.pyc
- __MACOSX/supplementary_neurips/code/data/data_utils/__pycache__/._transform.cpython-37.pyc
- supplementary_neurips/code/data/data_utils/__pycache__/random_erasing.cpython-37.pyc
- __MACOSX/supplementary_neurips/code/data/data_utils/__pycache__/._random_erasing.cpython-37.pyc
- supplementary_neurips/code/models/networks/networks_utils/__pycache__/slowfast_head_helper.cpython-37.pyc
- __MACOSX/supplementary_neurips/code/models/networks/networks_utils/__pycache__/._slowfast_head_helper.cpython-37.pyc
- supplementary_neurips/code/models/networks/networks_utils/__pycache__/slowfast_utils.cpython-38.pyc
- __MACOSX/supplementary_neurips/code/models/networks/networks_utils/__pycache__/._slowfast_utils.cpython-38.pyc
- supplementary_neurips/code/models/networks/networks_utils/__pycache__/slowfast_nonlocal_helper.cpython-38.pyc
- __MACOSX/supplementary_neurips/code/models/networks/networks_utils/__pycache__/._slowfast_nonlocal_helper.cpython-38.pyc
- supplementary_neurips/code/models/networks/networks_utils/__pycache__/slowfast_distributed.cpython-37.pyc
- __MACOSX/supplementary_neurips/code/models/networks/networks_utils/__pycache__/._slowfast_distributed.cpython-37.pyc
- supplementary_neurips/code/models/networks/networks_utils/__pycache__/slowfast_common.cpython-37.pyc
- __MACOSX/supplementary_neurips/code/models/networks/networks_utils/__pycache__/._slowfast_common.cpython-37.pyc
- supplementary_neurips/code/models/networks/networks_utils/__pycache__/slowfast_operators.cpython-38.pyc
- __MACOSX/supplementary_neurips/code/models/networks/networks_utils/__pycache__/._slowfast_operators.cpython-38.pyc
- supplementary_neurips/code/models/networks/networks_utils/__pycache__/slowfast_attention.cpython-37.pyc
- __MACOSX/supplementary_neurips/code/models/networks/networks_utils/__pycache__/._slowfast_attention.cpython-37.pyc
- supplementary_neurips/code/models/networks/networks_utils/__pycache__/slowfast_stem_helper.cpython-37.pyc
- __MACOSX/supplementary_neurips/code/models/networks/networks_utils/__pycache__/._slowfast_stem_helper.cpython-37.pyc
- supplementary_neurips/code/models/networks/networks_utils/__pycache__/slowfast_batchnorm_helper.cpython-38.pyc
- __MACOSX/supplementary_neurips/code/models/networks/networks_utils/__pycache__/._slowfast_batchnorm_helper.cpython-38.pyc
- supplementary_neurips/code/models/networks/networks_utils/__pycache__/slowfast_weight_init_helper.cpython-38.pyc
- __MACOSX/supplementary_neurips/code/models/networks/networks_utils/__pycache__/._slowfast_weight_init_helper.cpython-38.pyc
- supplementary_neurips/code/models/networks/networks_utils/__pycache__/slowfast_resnet_helper.cpython-37.pyc
- __MACOSX/supplementary_neurips/code/models/networks/networks_utils/__pycache__/._slowfast_resnet_helper.cpython-37.pyc
- supplementary_neurips/code/models/networks/networks_utils/__pycache__/vit_utils.cpython-37.pyc
- __MACOSX/supplementary_neurips/code/models/networks/networks_utils/__pycache__/._vit_utils.cpython-37.pyc
- supplementary_neurips/code/models/networks/networks_utils/__pycache__/slowfast_resnet_helper.cpython-38.pyc
- __MACOSX/supplementary_neurips/code/models/networks/networks_utils/__pycache__/._slowfast_resnet_helper.cpython-38.pyc
- supplementary_neurips/code/models/networks/networks_utils/__pycache__/vit_utils.cpython-38.pyc
- __MACOSX/supplementary_neurips/code/models/networks/networks_utils/__pycache__/._vit_utils.cpython-38.pyc
- supplementary_neurips/code/models/networks/networks_utils/__pycache__/slowfast_batchnorm_helper.cpython-37.pyc
- __MACOSX/supplementary_neurips/code/models/networks/networks_utils/__pycache__/._slowfast_batchnorm_helper.cpython-37.pyc
- supplementary_neurips/code/models/networks/networks_utils/__pycache__/slowfast_weight_init_helper.cpython-37.pyc
- __MACOSX/supplementary_neurips/code/models/networks/networks_utils/__pycache__/._slowfast_weight_init_helper.cpython-37.pyc
- supplementary_neurips/code/models/networks/networks_utils/__pycache__/slowfast_operators.cpython-37.pyc
- __MACOSX/supplementary_neurips/code/models/networks/networks_utils/__pycache__/._slowfast_operators.cpython-37.pyc
- supplementary_neurips/code/models/networks/networks_utils/__pycache__/slowfast_attention.cpython-38.pyc
- __MACOSX/supplementary_neurips/code/models/networks/networks_utils/__pycache__/._slowfast_attention.cpython-38.pyc
- supplementary_neurips/code/models/networks/networks_utils/__pycache__/slowfast_stem_helper.cpython-38.pyc
- __MACOSX/supplementary_neurips/code/models/networks/networks_utils/__pycache__/._slowfast_stem_helper.cpython-38.pyc
- supplementary_neurips/code/models/networks/networks_utils/__pycache__/slowfast_head_helper.cpython-38.pyc
- __MACOSX/supplementary_neurips/code/models/networks/networks_utils/__pycache__/._slowfast_head_helper.cpython-38.pyc
- supplementary_neurips/code/models/networks/networks_utils/__pycache__/slowfast_utils.cpython-37.pyc
- __MACOSX/supplementary_neurips/code/models/networks/networks_utils/__pycache__/._slowfast_utils.cpython-37.pyc
- supplementary_neurips/code/models/networks/networks_utils/__pycache__/slowfast_nonlocal_helper.cpython-37.pyc
- __MACOSX/supplementary_neurips/code/models/networks/networks_utils/__pycache__/._slowfast_nonlocal_helper.cpython-37.pyc
- supplementary_neurips/code/models/networks/networks_utils/__pycache__/slowfast_distributed.cpython-38.pyc
- __MACOSX/supplementary_neurips/code/models/networks/networks_utils/__pycache__/._slowfast_distributed.cpython-38.pyc
- supplementary_neurips/code/models/networks/networks_utils/__pycache__/slowfast_common.cpython-38.pyc
- __MACOSX/supplementary_neurips/code/models/networks/networks_utils/__pycache__/._slowfast_common.cpython-38.pyc
- supplementary_neurips/code/models/networks/video_models/__pycache__/basic_networks.cpython-38.pyc
- __MACOSX/supplementary_neurips/code/models/networks/video_models/__pycache__/._basic_networks.cpython-38.pyc
- supplementary_neurips/code/models/networks/video_models/__pycache__/__init__.cpython-38.pyc
- __MACOSX/supplementary_neurips/code/models/networks/video_models/__pycache__/.___init__.cpython-38.pyc
- supplementary_neurips/code/models/networks/video_models/__pycache__/vivit.cpython-37.pyc
- __MACOSX/supplementary_neurips/code/models/networks/video_models/__pycache__/._vivit.cpython-37.pyc
- supplementary_neurips/code/models/networks/video_models/__pycache__/clip.cpython-38.pyc
- __MACOSX/supplementary_neurips/code/models/networks/video_models/__pycache__/._clip.cpython-38.pyc
- supplementary_neurips/code/models/networks/video_models/__pycache__/mvit.cpython-37.pyc
- __MACOSX/supplementary_neurips/code/models/networks/video_models/__pycache__/._mvit.cpython-37.pyc
- supplementary_neurips/code/models/networks/video_models/__pycache__/inception.cpython-37.pyc
- __MACOSX/supplementary_neurips/code/models/networks/video_models/__pycache__/._inception.cpython-37.pyc
- supplementary_neurips/code/models/networks/video_models/__pycache__/x3d.cpython-38.pyc
- __MACOSX/supplementary_neurips/code/models/networks/video_models/__pycache__/._x3d.cpython-38.pyc
- supplementary_neurips/code/models/networks/video_models/__pycache__/r2plus1.cpython-37.pyc
- __MACOSX/supplementary_neurips/code/models/networks/video_models/__pycache__/._r2plus1.cpython-37.pyc
- supplementary_neurips/code/models/networks/video_models/__pycache__/timesformer.cpython-37.pyc
- __MACOSX/supplementary_neurips/code/models/networks/video_models/__pycache__/._timesformer.cpython-37.pyc
[truncated: 330 more entries]
