# Supplementary material
Source: ML conference proceedings conference paper supplement (https://proceedings.neurips.cc/paper_files/paper/2022/hash/58f4a9ca9031ff197cb4a61b456574bf-Abstract.html)
Supplement: Supplementary file 1 [file 58f4a9ca9031ff197cb4a61b456574bf-Supplemental-Conference.zip › supplementary_neurips/code/configs/checkpoint/every_n_train_steps.yaml]

every_n_train_steps: 10000
filename: 'epoch={epoch}-val_loss={validate/loss:.5f}'
auto_insert_metric_name: False
