# Supplementary material
Source: ML conference proceedings conference paper supplement (https://proceedings.neurips.cc/paper_files/paper/2022/hash/58f4a9ca9031ff197cb4a61b456574bf-Abstract.html)
Supplement: Supplementary file 1 [file 58f4a9ca9031ff197cb4a61b456574bf-Supplemental-Conference.zip › supplementary_neurips/code/configs/dataset/dataset_defaults.yaml]

dataset_name:                                         # Name of the dataset class
dataset_params:
  path:                                               # Path of the dataset
  num_classes:
  resolution: 224                                     # Input image resolution
  num_frames: 16                                      # Duration of video
  video_sampling_interval: 4                          # Number of frames after which we sample one frame
  video_augmentations:
    mean: [ 0.485, 0.456, 0.406 ]
    std: [ 0.229, 0.224, 0.225 ]
    color_jitter: 0.4
    aa_type: rand-m7-n4-mstd0.5-inc1
    interpolation: bicubic
    re_prob: 0.25
    re_mode: pixel
    re_count: 1
    re_split: False
    random_flip: False
    inv_uniform_sampling: False
  jitter_info:
    train_jitter_scales: [ 256, 320 ]
    train_jitter_scales_relative: [ 0.08, 1.0 ]
    train_jitter_aspect_relative: [ 0.75, 1.3333 ]
    train_jitter_motion_shift: False
  max_videos: null                                    # Max number of samples in dataset
  seed: ${seed}
dataloader_params:
  num_workers: 8
  pin_memory: true
  prefetch_factor: 2
  persistent_workers: true                            # This maintains workers alive across epochs
  batch_size: 16
split_use: null                                       # e.g. val or test. Used for evaluation
