# Supplementary material
Source: ML conference proceedings conference paper supplement (https://proceedings.neurips.cc/paper_files/paper/2022/hash/58f4a9ca9031ff197cb4a61b456574bf-Abstract.html)
Supplement: Supplementary file 1 [file 58f4a9ca9031ff197cb4a61b456574bf-Supplemental-Conference.zip › supplementary_neurips/code/configs/dataset/finegym.yaml]

defaults:
  - dataset_defaults
dataset_name: FineGym
dataset_params: # Overwrite parameters in dataset_defaults
  path: /path/to/datasets/FineGym
