# Supplementary material
Source: ML conference proceedings conference paper supplement (https://proceedings.neurips.cc/paper_files/paper/2022/hash/58f4a9ca9031ff197cb4a61b456574bf-Abstract.html)
Supplement: Supplementary file 1 [file 58f4a9ca9031ff197cb4a61b456574bf-Supplemental-Conference.zip › supplementary_neurips/code/configs/debug/debug_cpu.yaml]

# @package _global_
dataset:
  dataloader_params:
    num_workers: 0
    persistent_workers: false
    batch_size: 4
    pin_memory: false
  dataset_params:
    max_videos: 50
trainer:
  gpus: null
  accelerator: null
  plugins: null
  precision: 32
wandb:
  group: debug
