# Supplementary material
Source: ML conference proceedings conference paper supplement (https://proceedings.neurips.cc/paper_files/paper/2022/hash/58f4a9ca9031ff197cb4a61b456574bf-Abstract.html)
Supplement: Supplementary file 1 [file 58f4a9ca9031ff197cb4a61b456574bf-Supplemental-Conference.zip › supplementary_neurips/code/configs/default.yaml]

defaults:
  - checkpoint: after_each_epoch
  - dataset: my_dataset
  - model: default_model
  - wandb: wandb
  - trainer: all_gpus
  - resume: resume_defaults
  - override hydra/job_logging: stdout
seed: 42
verbose: True
