# Supplementary material
Source: ML conference proceedings conference paper supplement (https://proceedings.neurips.cc/paper_files/paper/2022/hash/58f4a9ca9031ff197cb4a61b456574bf-Abstract.html)
Supplement: Supplementary file 1 [file 58f4a9ca9031ff197cb4a61b456574bf-Supplemental-Conference.zip › supplementary_neurips/code/configs/experiments/qualitative_results/finegym_bbox_triplet_asym_long_interpolation.yaml]

# @package _global_
defaults:
  - override /dataset: finegym
  - override /trainer: single_gpu
dataset:
  dataloader_params:
    batch_size: 256
    num_workers: 6
    persistent_workers: True
  dataset_params:
    max_steps: 30
    min_steps_past: 8
    min_steps_future: 8
    #    max_clips_split: 128  # For one of the visualizations
    max_clips_split: 1024  # After that I ran this to obtain more samples
    predict_interpolate: True
checkpoint:
  save_top_k: 3
trainer:
  gpus: 1
  plugins: null
  max_epochs: 10000
model:
  predict_mode: visualize_trajectories
  name: TrajectoryModel
  time_encoder_strategy: 'fourier'
  time_decoder_strategy: 'fourier'
  latent_distribution: 'bbox'
  point_trajectory: False
  num_sample_points: 1  # To see diversity, add more numbers here
  distance_type: 'prediction'
  hidden_size: 512
  feature_size: 512
  encoder_params:
    name: TransformerEncoder
    num_layers: 2
    nhead: 2
    in_size: 50  # Size of the points (25*2)
    return_cls: True
  decoder_params:
    name: ResnetFC
    in_size: 1
    out_size: 50  # Size of the points (25*2)
    n_blocks: 4
  loss_params:
    dict_losses:
      trajectory_loss:
        λ: 1
        params:
          loss_type: triplet
          margin: 1.
      reconstruction_loss:
        λ: 1
        params:
          distance_fn_name: 'euclidean_l2_keypoints'
          loss_type: 'regression'
  generate_extrapolation: True
  reconstruct_intersection: True
  reencode: True
  use_all: True
  symmetric_dist: False
setting: predict
wandb:
  name: finegym_bbox_triplet_asym_long
resume:
  id: 136u3vuq
  load_model: True
  epoch: best
  check_config: False
