# Supplementary material
Source: ML conference proceedings conference paper supplement (https://proceedings.neurips.cc/paper_files/paper/2022/hash/58f4a9ca9031ff197cb4a61b456574bf-Abstract.html)
Supplement: Supplementary file 1 [file 58f4a9ca9031ff197cb4a61b456574bf-Supplemental-Conference.zip › supplementary_neurips/code/configs/experiments/qualitative_results/finegym_pca_temporal_offset.yaml]

# @package _global_
defaults:
  - override /dataset: finegym
  - override /trainer: single_gpu
dataset:
  dataloader_params:
    batch_size: 256
    num_workers: 6
    persistent_workers: True
  dataset_params:
    max_steps: 10
    min_steps_past: 3
    min_steps_future: 3
    max_clips_split: 128
    pca_augmentation: temporal_offset
trainer:
  gpus: 1
  plugins: null
model:
  predict_mode: visualize_pca_increment_offset_4.0
  name: TrajectoryModel
  time_encoder_strategy: 'fourier'
  time_decoder_strategy: 'fourier'
  latent_distribution: 'gaussian'
  point_trajectory: False
  num_sample_points: 1
  distance_type: 'optimal-transport'
  hidden_size: 512
  feature_size: 512
  encoder_params:
    name: TransformerEncoder
    num_layers: 2
    nhead: 2
    in_size: 50  # Size of the points (25*2)
    return_cls: True
  decoder_params:
    name: ResnetFC
    in_size: 1
    out_size: 50  # Size of the points (25*2)
    n_blocks: 4
  loss_params:
    dict_losses:
      trajectory_loss:
        λ: 1
        params:
          loss_type: triplet
          margin: 10.
      reconstruction_loss:
        λ: 1
        params:
          distance_fn_name: 'euclidean_l1_keypoints'
          loss_type: 'regression'
  generate_extrapolation: True
  reconstruct_intersection: True
  reencode: True
#  use_all: True
setting: predict
wandb:
  name: finegym_gaussian_ot_l1_viz
  save: False
resume:
  id: auql9cw3
  load_model: True
  epoch: last
  check_config: False
