# Supplementary material
Source: ML conference proceedings conference paper supplement (https://proceedings.neurips.cc/paper_files/paper/2022/hash/58f4a9ca9031ff197cb4a61b456574bf-Abstract.html)
Supplement: Supplementary file 1 [file 58f4a9ca9031ff197cb4a61b456574bf-Supplemental-Conference.zip › supplementary_neurips/code/configs/model/default_model.yaml]

defaults:
  - optim_params: optim_deit
  - loss_params: loss_defaults
name: null
predict_mode: null
id_model: ${resume.id}
