# Supplementary material
Source: ML conference proceedings conference paper supplement (https://proceedings.neurips.cc/paper_files/paper/2022/hash/58f4a9ca9031ff197cb4a61b456574bf-Abstract.html)
Supplement: Supplementary file 1 [file 58f4a9ca9031ff197cb4a61b456574bf-Supplemental-Conference.zip › supplementary_neurips/code/configs/model/model_params/timesformer_howto_large.yaml]

name: TimeSformer
# This corresponds to the TimeSformer_divST_32x32_224_HowTo100M checkpoint
img_size: ${assert_value:${dataset.dataset_params.resolution},224}
patch_size: 16
in_chans: 3
num_classes: ${model.feature_size}  # 1059
embed_dim: 768
depth: 12
num_heads: 8
mlp_ratio: 4.
attn_drop_rate: 0.
drop_path_rate: 0.1
num_frames: 32
attention_type: 'divided_space_time'
dropout: 0.
qkv_bias: True
