# Supplementary material
Source: ML conference proceedings conference paper supplement (https://proceedings.neurips.cc/paper_files/paper/2022/hash/58f4a9ca9031ff197cb4a61b456574bf-Abstract.html)
Supplement: Supplementary file 1 [file 58f4a9ca9031ff197cb4a61b456574bf-Supplemental-Conference.zip › supplementary_neurips/code/configs/model/model_params/timesformer_ssv2.yaml]

name: TimeSformer
# This corresponds to the TimeSformer_divST_64_224_SSv2.pyth  checkpoint
img_size: ${assert_value:${dataset.dataset_params.resolution},224}
patch_size: 16
in_chans: 3
num_classes: 174  # ${model.feature_size}
embed_dim: 768
depth: 12
num_heads: 8
mlp_ratio: 4.
attn_drop_rate: 0.
drop_path_rate: 0.1
num_frames: 64
attention_type: 'divided_space_time'
dropout: 0.
qkv_bias: True

# SAMPLING_RATE: 8
# CROP_SIZE: 224

# In the dataset, add this:
#color_jitter: 0.0
#inv_uniform_sample: true
#random_flip: False  # same as default
#re_prob: 0.
#video_sampling_rate: 8
#jitter_info:
#  train_jitter_scales: [ 224, 224 ]
