# Supplementary material
Source: ML conference proceedings conference paper supplement (https://proceedings.neurips.cc/paper_files/paper/2022/hash/58f4a9ca9031ff197cb4a61b456574bf-Abstract.html)
Supplement: Supplementary file 1 [file 58f4a9ca9031ff197cb4a61b456574bf-Supplemental-Conference.zip › supplementary_neurips/code/configs/model/optim_params/optim_deit.yaml]

zero_wd_1d_param: False
base_lr_scale_num_shards: True
base_lr: ${str_to_float:0.0005*${dataset.dataloader_params.batch_size}/512}
cosine_after_warmup: True
cosine_end_lr: 1e-6
warmup_start_lr: 0.0001
warmup_epochs: 1000  # This is the number of training steps, not epochs
lr_policy: cosine
max_epoch: 2000  # This is the number of training steps, not epochs. It is T/2
weight_decay: 0.05
optimizing_method: adamw
grad_clip_val: 0
grad_clip_strategy: value
