# Supplementary material
Source: ML conference proceedings conference paper supplement (https://proceedings.neurips.cc/paper_files/paper/2022/hash/58f4a9ca9031ff197cb4a61b456574bf-Abstract.html)
Supplement: Supplementary file 1 [file 58f4a9ca9031ff197cb4a61b456574bf-Supplemental-Conference.zip › supplementary_neurips/code/configs/model/optim_params/optim_x3d.yaml]

defaults:
  - optim_defaults
optimizing_method: sgd
lr_policy: cosine
base_lr_scale_num_shards: True
base_lr: 0.05  # 1 machine
weight_decay: 5e-5
warmup_epochs: 35.0
max_epoch: 256
warmup_start_lr: 0.01
zero_wd_1d_param: False
momentum: 0.9
dampening: 0.0
nesterov: True
