# Supplementary material
Source: ML conference proceedings conference paper supplement (https://proceedings.neurips.cc/paper_files/paper/2022/hash/58f4a9ca9031ff197cb4a61b456574bf-Abstract.html)
Supplement: Supplementary file 1 [file 58f4a9ca9031ff197cb4a61b456574bf-Supplemental-Conference.zip › supplementary_neurips/code/configs/resume/resume_defaults.yaml]

id: null
path: null
epoch: null
load_all: false
load_state: false
load_model: false
load_any: ${any:${.load_all},${.load_state},${.load_model}}
dir_checkpoint: ${wandb.project}
check_config: True
