# Supplementary material
Source: ML conference proceedings conference paper supplement (https://proceedings.neurips.cc/paper_files/paper/2022/hash/58f4a9ca9031ff197cb4a61b456574bf-Abstract.html)
Supplement: Supplementary file 1 [file 58f4a9ca9031ff197cb4a61b456574bf-Supplemental-Conference.zip › supplementary_neurips/code/configs/trainer/all_gpus.yaml]

benchmark: true
deterministic: true
precision: 16
max_steps: 10000000
profiler: simple
accelerator: ddp
gpus: 8
plugins: ddp_sharded
log_every_n_steps: 5
max_epochs: 200
