# Supplementary material
Source: ML conference proceedings conference paper supplement (https://proceedings.neurips.cc/paper_files/paper/2022/hash/58f4a9ca9031ff197cb4a61b456574bf-Abstract.html)
Supplement: Supplementary file 1 [file 58f4a9ca9031ff197cb4a61b456574bf-Supplemental-Conference.zip › supplementary_neurips/code/configs/wandb/wandb.yaml]

group: sandbox
project: transport_prediction
entity: username
offline: false
save_dir: /path/to/logs/
name: my_experiment
id: ${if:${resume.load_all},${resume.id}}
save: True
