# Supplementary material
Source: ML conference proceedings conference paper supplement (https://proceedings.neurips.cc/paper_files/paper/2022/hash/58f4a9ca9031ff197cb4a61b456574bf-Abstract.html)
Supplement: Supplementary file 1 [file 58f4a9ca9031ff197cb4a61b456574bf-Supplemental-Conference.zip › supplementary_neurips/code/data/__init__.py]

from .main_data_module import *


def get_datamodule(dataset_name, **dataset_params) -> LightningDataModule:
    dataset_class = getattr(sys.modules[__name__], dataset_name)
    return MainDataModule(dataset_class, **dataset_params)
