# Supplementary material
Source: ML conference proceedings conference paper supplement (https://proceedings.neurips.cc/paper_files/paper/2022/hash/58f4a9ca9031ff197cb4a61b456574bf-Abstract.html)
Supplement: Supplementary file 1 [file 58f4a9ca9031ff197cb4a61b456574bf-Supplemental-Conference.zip › supplementary_neurips/code/models/__init__.py]

import sys
from typing import Any, Dict, Tuple

from .rnn_model import VRNNModel
from .trajectory_model import TrajectoryModel


def get_model(name: str, **kwargs: Dict[str, Any]) -> Tuple[Any, Dict[str, Dict[str, Any]]]:
    return getattr(sys.modules[__name__], name), kwargs
