# Supplementary material
Source: ML conference proceedings conference paper supplement (https://proceedings.neurips.cc/paper_files/paper/2022/hash/58f4a9ca9031ff197cb4a61b456574bf-Abstract.html)
Supplement: Supplementary file 1 [file 58f4a9ca9031ff197cb4a61b456574bf-Supplemental-Conference.zip › supplementary_neurips/code/models/networks/__init__.py]

import importlib
import sys

from torch import nn

from models.networks.baselines_networks import *
from models.networks.implicit import *
from models.networks.positional_encodings import *
from models.networks.transformers import *


def get_network(name: str, **kwargs) -> nn.Module:
    if name is None:
        return nn.Identity()
    if name.startswith('torch_'):
        return getattr(importlib.import_module('torchvision.models'), name.replace('torch_', ''))
    else:
        return getattr(sys.modules[__name__], name)(**kwargs)
