# Supplementary material
Source: ML conference proceedings conference paper supplement (https://proceedings.neurips.cc/paper_files/paper/2022/hash/58f4a9ca9031ff197cb4a61b456574bf-Abstract.html)
Supplement: Supplementary file 1 [file 58f4a9ca9031ff197cb4a61b456574bf-Supplemental-Conference.zip › supplementary_neurips/code/models/prediction.py]

"""
Methods to be called in the prediction phase. All of these are called from the LightningModule class, but we put them
in a separate file to make the different files easier to read.
These methods have two components: the step (for every batch), and the on_predict_end (join all batches)
"""

from __future__ import annotations

from pathlib import Path

import matplotlib.pyplot as plt
import numpy as np
import torch
from sklearn.decomposition import PCA

import distances
from models.trajectory_dict import TrajectoryDict


def visualize(dataset, predict_mode, save_tensors, reconstruct_intersection=False, sample_distribution_fn=None,
              distance_type=None, num_latent_params=2, point_trajectory=False, model_id=None, latent_distribution=None,
              vrnn_model=False, decode_fn=None):
    if predict_mode in ['visualize_trajectories']:
        saved_tensors = save_tensors.compute()
        save_names = save_tensors.tensor_names
        dataset.visualize_trajectories(saved_tensors, save_names, reconstruct_intersection, model_id, vrnn_model)
    elif predict_mode == 'visualize_intersection':
        visualize_intersection_end(save_tensors, sample_distribution_fn, num_latent_params, point_trajectory,
                                   latent_distribution)
    elif predict_mode.startswith('visualize_pca_increment'):
        visualize_pca_increment_end(save_tensors, num_latent_params, latent_distribution, distance_type, decode_fn,
                                    dataset, model_id, predict_mode)


def visualize_intersection_end(save_tensors, sample_distribution_fn, num_latent_params, point_trajectory,
                               latent_distribution, plot_viz=True):
    prob_fn = distances.get_prob_fn(latent_distribution)

    sample_ids, tra_inp_p, tra_inp_f = save_tensors.compute()
    past = {'tensor': tra_inp_p.float(), 'origin': 'past'}
    future = {'tensor': tra_inp_f.float(), 'origin': 'future'}
    intersection = distances.compute_intersection(past['tensor'], future['tensor'], point_trajectory,
                                                  num_latent_params, latent_distribution)
    samples = sample_distribution_fn(tra_inp_p)
    param_1_past, param_2_past = distances.get_params(tra_inp_p, num_latent_params)
    param_1_future, param_2_future = distances.get_params(tra_inp_f, num_latent_params)
    param_1_int, param_2_int = distances.get_params(intersection, num_latent_params)
    log_prob = prob_fn(param_1_past.float()[:, None], param_2_past.float()[:, None], samples)
    log_prob_intersection = prob_fn(param_1_int.float()[:, None], param_2_int.float()[:, None], samples)

    print(log_prob.mean(), log_prob_intersection.mean())

    if plot_viz:
        num_samples_viz = 2
        fig, axes = plt.subplots(param_1_past.shape[-1], num_samples_viz, dpi=100,
                                 figsize=(num_samples_viz * 3, param_1_past.shape[-1]))
        var_past = (param_2_past.float() / 2).exp()
        for i in range(num_samples_viz):
            # Plot the first sample, all dimensions separately
            lower_bound = param_1_past[i].min() - 1 * var_past[i].max()
            upper_bound = param_1_past[i].max() + 1 * var_past[i].max()
            resolution = 500
            x = torch.linspace(lower_bound, upper_bound, resolution)
            p_1_past_, p_2_past_ = param_1_past.float()[i][:, None, None], param_2_past.float()[i][:, None, None]
            p_1_fut_, p_2_fut_ = param_1_future.float()[i][:, None, None], param_2_future.float()[i][:, None, None]
            p_1_int_, p_2_int_ = param_1_int.float()[i][:, None, None], param_2_int.float()[i][:, None, None]
            dist_past = prob_fn(p_1_past_, p_2_past_, x[None, :, None])
            dist_future = prob_fn(p_1_fut_, p_2_fut_, x[None, :, None])
            dist_int = prob_fn(p_1_int_, p_2_int_, x[None, :, None])
            for j in range(dist_past.shape[0]):  # for all dimensions
                axes[j][i].plot(x, dist_past[j].exp(), c='g')
                axes[j][i].plot(x, dist_future[j].exp(), c='r')
                axes[j][i].plot(x, dist_int[j].exp(), c='b')

        plt.show()


def visualize_pca_increment_end(save_tensors, num_latent_params, latent_distribution, distance_type, decode_fn,
                                dataset, model_id, predict_mode):
    """
    Computes the principal components for every GROUP of trajectories. Each group consists of a base trajectory modified
    according to some attribute (there can be an increment in speed, position, etc.). This function return the most
    important dimension for that attribute (the dimensions that change the most in that attribute)
    """
    sample_ids, tra_inp_a, seg_inp_a, time_indices = save_tensors.compute()
    num_per_sample = sample_ids[:, 1].max() + 1
    tra_inp_a = tra_inp_a.view(-1, num_per_sample, tra_inp_a.shape[-1])
    param_1, param_2 = distances.get_params(tra_inp_a, num_latent_params)

    k = []
    for i in range(tra_inp_a.shape[0]):
        # NOTE: We only use the mean of the distribution, assuming that is the point representing the trajectory.
        # The point-to-point metric used (assumed) in the trajectory space is the Euclidean metric
        # assert latent_distribution == 'gaussian', \
        #     'Euclidean metric (assumed) does not work for boxes. Think of something else'

        # param_1_a, param_1_b = param_1[:, None], param_1[None, :]
        # param_2_a, param_2_b = (param_2[:, None], param_2[None, :]) if param_2 is not None else (None, None)
        # dissimilarity_matrix = dist_fn(param_1_a, param_1_b, param_2_a, param_2_b, distance_type=distance_type)
        # embedding = MDS(n_components=1, dissimilarity='precomputed')
        # embedding.fit(dissimilarity_matrix.numpy())

        pca = PCA(n_components=1)
        pca.fit(param_1[i])
        k.append(pca.components_[0])

    *_, opt, delta = predict_mode.split('_')
    delta = float(delta)

    if opt == 'speed':
        index_original = 3
    else:  # offset
        index_original = 0

    k = np.stack(k)
    k = k.mean(0)  # k is the direction that changes the parameter we are modifying.
    important_dims = np.where(k > k.max() / 2)[0]

    # We make it the same size as the ground truth variations
    # alpha = torch.arange(-tra_inp_a.shape[1]/2, tra_inp_a.shape[1]/2)[None, :, None]
    alpha = torch.arange(tra_inp_a.shape[1])[None, :, None]
    # We take the original sequence and modify it gradually
    trajectories = (param_1[:, index_original:index_original + 1] + alpha * k * delta).cuda().float()
    num_steps = time_indices.shape[-1] * 2
    time_indices_decode = torch.arange(num_steps)[None, :].expand(param_1.shape[0], num_steps).cuda().float()
    time_labels_decode = ['custom']
    vid_len_decode = torch.tensor([num_steps]).expand(param_1.shape[0])
    tensor_size = torch.tensor([param_1.shape[0]])  # We treat the num_steps as different samples

    # First, only take one copy out of the num_per_sample we have (this num_per_sample is defined in collate_fn)
    ground_truth = seg_inp_a.view(-1, num_per_sample, *seg_inp_a.shape[1:])[:, index_original]
    time_indices = time_indices.view(time_indices_decode.shape[0], -1, *time_indices.shape[1:])[:, index_original]

    prior_dict = TrajectoryDict({'custom': {'tensor': None, 'space': 'traj', 'time_label': None, 'time_steps': None,
                                            'seg_len': None, 'origin': 'custom', 'splitting': 1}})
    decoded_points, dict_decoded = decode_fn(trajectories, time_indices_decode, time_labels_decode, vid_len_decode,
                                             prior_dict, tensor_size)

    time_indices_decode = time_indices_decode.cpu()
    #
    # Adapt ground truth times to our decoding times
    aux_1 = time_indices_decode[..., None] <= time_indices[:, None, :]
    aux_2 = aux_1.float().argmax(dim=-1)  # Argmax returns the first index
    ground_truth = ground_truth[torch.arange(ground_truth.shape[0]).unsqueeze(1), aux_2]

    times = ('all', time_indices_decode, torch.tensor([num_steps] * time_indices_decode.shape[0]))
    options = [('ground truth', ground_truth), ('prediction', decoded_points)]

    sample_ids = sample_ids.view(-1, num_per_sample, 2)[:, 0, 0]
    for i in range(10):
        trajectories = {}
        for option in options:
            name, tensor = option
            traj = tensor[i, :times[2][i]]
            traj = traj.view(*traj.shape[:-1], 25, 2).cpu()
            trajectories[name] = traj

        timestamps = times[1][i][:times[2][i]]
        timestamps = timestamps - timestamps[0]  # First timestamp start at 0
        timestamps = timestamps / 25  # fps = 25
        timestamps = (timestamps, ('all',) * num_steps)
        keypoints = (trajectories, timestamps), -1, -1

        event_id, segment_id, start = dataset.clip_infos[dataset.clip_ids[sample_ids[i]]]
        segment, first_frame, last_frame = dataset.trajectories[(event_id, segment_id)]

        path_save = Path(f'/path/to/save/pca_increment_{opt}/{model_id}/'
                         f'video_delta_{delta}_{i}_{event_id}_{first_frame + start}.mp4')

        dataset.visualize_pose(keypoints, is_video=True, path_save=path_save, blit=True, subplots=True,
                               num_sampled_points=tra_inp_a.shape[1])

    print(f'Most important dimensions: {important_dims}')
