# Supplementary material
Source: ML conference proceedings conference paper supplement (https://proceedings.neurips.cc/paper_files/paper/2022/hash/58f4a9ca9031ff197cb4a61b456574bf-Abstract.html)
Supplement: Supplementary file 1 [file 58f4a9ca9031ff197cb4a61b456574bf-Supplemental-Conference.zip › supplementary_neurips/code/requirements.yml]

name: env_myname
channels:
  - pytorch
  - defaults
dependencies:
  - _libgcc_mutex=0.1=main
  - _openmp_mutex=4.5=1_gnu
  - blas=1.0=mkl
  - bzip2=1.0.8=h7b6447c_0
  - ca-certificates=2021.10.26=h06a4308_2
  - certifi=2021.10.8=py38h06a4308_0
  - cudatoolkit=10.2.89=hfd86e86_1
  - freetype=2.11.0=h70c0345_0
  - giflib=5.2.1=h7b6447c_0
  - gmp=6.2.1=h2531618_2
  - gnutls=3.6.15=he1e5248_0
  - intel-openmp=2021.4.0=h06a4308_3561
  - jpeg=9d=h7f8727e_0
  - lame=3.100=h7b6447c_0
  - lcms2=2.12=h3be6417_0
  - ld_impl_linux-64=2.35.1=h7274673_9
  - libffi=3.3=he6710b0_2
  - libgcc-ng=9.3.0=h5101ec6_17
  - libgfortran-ng=7.5.0=ha8ba4b0_17
  - libgfortran4=7.5.0=ha8ba4b0_17
  - libgomp=9.3.0=h5101ec6_17
  - libiconv=1.15=h63c8f33_5
  - libidn2=2.3.2=h7f8727e_0
  - libpng=1.6.37=hbc83047_0
  - libstdcxx-ng=9.3.0=hd4cf53a_17
  - libtasn1=4.16.0=h27cfd23_0
  - libtiff=4.2.0=h85742a9_0
  - libunistring=0.9.10=h27cfd23_0
  - libuv=1.40.0=h7b6447c_0
  - libwebp=1.2.0=h89dd481_0
  - libwebp-base=1.2.0=h27cfd23_0
  - lz4-c=1.9.3=h295c915_1
  - mkl=2021.4.0=h06a4308_640
  - mkl-service=2.4.0=py38h7f8727e_0
  - mkl_fft=1.3.1=py38hd3c417c_0
  - mkl_random=1.2.2=py38h51133e4_0
  - ncurses=6.3=h7f8727e_2
  - nettle=3.7.3=hbbd107a_1
  - olefile=0.46=pyhd3eb1b0_0
  - openh264=2.1.0=hd408876_0
  - openssl=1.1.1l=h7f8727e_0
  - pillow=8.4.0=py38h5aabda8_0
  - pip=21.2.4=py38h06a4308_0
  - python=3.8.12=h12debd9_0
  - pytorch=1.10.0=py3.8_cuda10.2_cudnn7.6.5_0
  - pytorch-mutex=1.0=cuda
  - readline=8.1=h27cfd23_0
  - scipy=1.7.1=py38h292c36d_2
  - setuptools=58.0.4=py38h06a4308_0
  - six=1.16.0=pyhd3eb1b0_0
  - sqlite=3.36.0=hc218d9a_0
  - tk=8.6.11=h1ccaba5_0
  - torchaudio=0.10.0=py38_cu102
  - torchvision=0.11.1=py38_cu102
  - tqdm=4.62.3=pyhd3eb1b0_1
  - typing_extensions=3.10.0.2=pyh06a4308_0
  - wheel=0.37.0=pyhd3eb1b0_1
  - xz=5.2.5=h7b6447c_0
  - zlib=1.2.11=h7b6447c_3
  - zstd=1.4.9=haebb681_0
  - pip:
      - absl-py==1.0.0
      - aiohttp==3.8.1
      - aiosignal==1.2.0
      - antlr4-python3-runtime==4.8
      - argon2-cffi==21.3.0
      - argon2-cffi-bindings==21.2.0
      - asttokens==2.0.5
      - async-timeout==4.0.1
      - attrs==21.2.0
      - audioread==2.1.9
      - backcall==0.2.0
      - bleach==4.1.0
      - box-embeddings==0.1.0
      - cachetools==4.2.4
      - cffi==1.15.0
      - charset-normalizer==2.0.9
      - click==8.0.3
      - clip==0.2.0
      - configparser==5.2.0
      - cycler==0.11.0
      - cython==0.29.28
      - cython-bbox==0.1.3
      - debugpy==1.5.1
      - decorator==4.4.2
      - defusedxml==0.7.1
      - descartes==1.1.0
      - dill==0.3.4
      - docker-pycreds==0.4.0
      - einops==0.3.2
      - entrypoints==0.4
      - executing==0.8.3
      - ffmpeg==1.4
      - ffmpeg-python==0.2.0
      - ffprobe-python==1.0.3
      - filterpy==1.4.5
      - fire==0.4.0
      - flake8==4.0.1
      - flake8-import-order==0.18.1
      - flatbuffers==2.0
      - fonttools==4.28.3
      - frozenlist==1.2.0
      - fsspec==2021.11.1
      - future==0.18.2
      - fvcore==0.1.5.post20211023
      - gitdb==4.0.9
      - gitpython==3.1.24
      - google-auth==2.3.3
      - google-auth-oauthlib==0.4.6
      - grpcio==1.42.0
      - h5py==3.6.0
      - hydra-core==1.1.1
      - idna==3.3
      - imageio==2.16.1
      - imageio-ffmpeg==0.4.5
      - importlib-metadata==4.8.2
      - importlib-resources==5.4.0
      - iniconfig==1.1.1
      - iopath==0.1.9
      - ipykernel==6.9.1
      - ipython==8.1.0
      - ipython-genutils==0.2.0
      - ipywidgets==7.6.5
      - jedi==0.18.1
      - jinja2==3.0.3
      - joblib==1.1.0
      - jsonschema==4.4.0
      - jupyter==1.0.0
      - jupyter-client==7.1.2
      - jupyter-console==6.4.0
      - jupyter-core==4.9.2
      - jupyterlab-pygments==0.1.2
      - jupyterlab-widgets==1.0.2
      - kiwisolver==1.3.2
      - lap==0.4.0
      - librosa==0.8.1
      - llvmlite==0.37.0
      - loguru==0.6.0
      - markdown==3.3.6
      - markupsafe==2.1.0
      - matplotlib==3.5.0
      - matplotlib-inline==0.1.3
      - mccabe==0.6.1
      - mistune==0.8.4
      - motmetrics==1.2.0
      - moviepy==1.0.3
      - multidict==5.2.0
      - nbclient==0.5.11
      - nbconvert==6.4.2
      - nbformat==5.1.3
      - nest-asyncio==1.5.4
      - networkx==2.7.1
      - ninja==1.10.2.3
      - notebook==6.4.8
      - numba==0.54.1
      - numpy==1.20.3
      - nuscenes-devkit==1.1.9
      - oauthlib==3.1.1
      - omegaconf==2.1.1
      - onnx==1.8.1
      - onnx-simplifier==0.3.5
      - onnxoptimizer==0.2.6
      - onnxruntime==1.8.0
      - opencv-python==4.5.4.60
      - packaging==21.3
      - pandas==1.4.1
      - pandocfilters==1.5.0
      - parso==0.8.3
      - pathtools==0.1.2
      - pexpect==4.8.0
      - pickleshare==0.7.5
      - pluggy==1.0.0
      - pooch==1.5.2
      - portalocker==2.3.2
      - proglog==0.1.9
      - prometheus-client==0.13.1
      - promise==2.3
      - prompt-toolkit==3.0.28
      - protobuf==3.19.1
      - psutil==5.8.0
      - ptyprocess==0.7.0
      - pure-eval==0.2.2
      - py==1.11.0
      - py-cpuinfo==8.0.0
      - pyasn1==0.4.8
      - pyasn1-modules==0.2.8
      - pycocotools==2.0
      - pycodestyle==2.8.0
      - pycparser==2.21
      - pydeprecate==0.3.1
      - pyflakes==2.4.0
      - pygments==2.11.2
      - pyparsing==3.0.6
      - pyquaternion==0.9.9
      - pyrsistent==0.18.1
      - pytest==7.1.1
      - pytest-benchmark==3.4.1
      - python-dateutil==2.8.2
      - pytorch-lightning==1.5.5
      - pytz==2022.1
      - pywavelets==1.3.0
      - pyyaml==6.0
      - pyzmq==22.3.0
      - qtconsole==5.2.2
      - qtpy==2.0.1
      - requests==2.26.0
      - requests-oauthlib==1.3.0
      - resampy==0.2.2
      - rsa==4.8
      - scenedetect==0.5.6.1
      - scikit-image==0.19.2
      - scikit-learn==1.0.1
      - seaborn==0.11.2
      - send2trash==1.8.0
      - sentry-sdk==1.5.0
      - setuptools-scm==6.3.2
      - shapely==1.8.1.post1
      - shortuuid==1.0.8
      - smmap==5.0.0
      - soundfile==0.10.3.post1
      - sox==1.4.1
      - stack-data==0.2.0
      - subprocess32==3.5.4
      - tabulate==0.8.9
      - tensorboard==2.7.0
      - tensorboard-data-server==0.6.1
      - tensorboard-plugin-wit==1.8.0
      - termcolor==1.1.0
      - terminado==0.13.1
      - testpath==0.6.0
      - thop==0.0.31-2005241907
      - threadpoolctl==3.0.0
      - tifffile==2022.3.16
      - timm==0.4.12
      - tomli==1.2.2
      - torchmetrics==0.6.1
      - tornado==6.1
      - traitlets==5.1.1
      - urllib3==1.26.7
      - wandb==0.12.7
      - wcwidth==0.2.5
      - webencodings==0.5.1
      - werkzeug==2.0.2
      - widgetsnbextension==3.5.2
      - xmltodict==0.12.0
      - yacs==0.1.8
      - yarl==1.7.2
      - yaspin==2.1.0
      - zipp==3.6.0
prefix: /opt/conda/envs/env_myname
