# Supplementary material
Source: ML conference proceedings conference paper supplement (https://proceedings.neurips.cc/paper_files/paper/2022/hash/58f4a9ca9031ff197cb4a61b456574bf-Abstract.html)
Supplement: Supplementary file 1 [file 58f4a9ca9031ff197cb4a61b456574bf-Supplemental-Conference.zip › supplementary_neurips/README.txt]

- The code is in the `code` directory. Read the README.md within that directory for instructions on running it.
- The Appendix is in appendix.pdf
- The datasets (human keypoints) are in https://drive.google.com/file/d/1vCmNp1AO7NulaEQB50IOUdoJWfPXcAZ3/view?usp=sharing (anonymized link). 
  Extract the content there and update the directory path in the code (replace all "/path/to/datasets")
- The pretrained models are in https://drive.google.com/file/d/1Kil35RApC3Ysj50gpBwMI4Huw6ur3guV/view?usp=sharing (anonymized link). 
  Extract the content there and update the directory path in the code (replace all "path/to/logs")

The datasets and logs are compressed in a tar.gz format. In order to extract the contents, run:
tar -xvf name_file.tar.gz

Due to space constraints, we only uploaded a reduced version of the datasets and pretrained models. For the pretrained models, we share the ones for the short versions of FisV and FineGym datasets. Upon acceptance (when anonimity is not a constraint), we will be able to upload all the material.
